# Supplementary material
Source: PubMed Central journal article supplement (PMC8099315)

# THE LANCET

## Supplementary appendix

This appendix formed part of the original submission and has been peer reviewed. We post it as supplied by the authors.

Supplement to: Haas EJ, Angulo FJ, McLaughlin JM, et al. Impact and effectiveness of mRNA BNT162b2 vaccine against SARS-CoV-2 infections and COVID-19 cases, hospitalisations, and deaths following a nationwide vaccination campaign in Israel: an observational study using national surveillance data. *Lancet* 2021; published online May 5. [http://dx.doi.org/10.1016/S0140-6736\(21\)00947-8](http://dx.doi.org/10.1016/S0140-6736(21)00947-8).

## Table of Contents

| <b>Supplemental content</b>                                                                                                                                                                                                                                                                                                                                                                                                            | <b>Page No.</b> |
|----------------------------------------------------------------------------------------------------------------------------------------------------------------------------------------------------------------------------------------------------------------------------------------------------------------------------------------------------------------------------------------------------------------------------------------|-----------------|
| Supplement Table 1. Numbers and incidence rate (IR) per 100 000 person-days of laboratory-confirmed SARS-CoV-2 outcomes among unvaccinated and vaccinated with BNT162b2 $\geq 7$ days after the second dose, and unadjusted and adjusted estimates of vaccine effectiveness (VE) against laboratory-confirmed SARS-CoV-2 outcomes, by age-group,* Jan 24, 2021–Apr 3, 2021, Israel.                                                    | 3               |
| Supplement Table 2. Numbers and incidence rate (IR) per 100 000 person-days of laboratory-confirmed SARS-CoV-2 outcomes among unvaccinated and vaccinated with BNT162b2 $\geq 14$ days after the second dose, and unadjusted and adjusted estimates of vaccine effectiveness (VE) against laboratory-confirmed SARS-CoV-2 outcomes, by age-group,* Jan 24, 2021–Apr 3, 2021, Israel.                                                   | 4               |
| Supplemental Table 3. Numbers and incidence rate (IR) per 100 000 person-days of laboratory-confirmed SARS-CoV-2 outcomes among unvaccinated and partially-vaccinated (one dose of BNT162b2 14 days to 21 days after the first dose), and unadjusted and adjusted estimates of vaccine effectiveness (VE) against laboratory-confirmed SARS-CoV-2 outcomes among individuals $\geq 16$ years of age, Jan 24, 2021–Apr 3, 2021, Israel. | 5               |
| Supplemental Figure 1. Seven-day daily moving average of incidence rates of COVID-19 hospitalizations per 1,000,000 and prevalence of BNT162b2 vaccination among persons aged 16–24, 25–44, 45–64, and $\geq 65$ years Dec 1, 2020 – Apr 3, 2021, Israel.                                                                                                                                                                              | 6               |
| Supplemental Figure 2. Seven-day daily moving average of incidence rates of COVID-19 severe and critical hospitalizations per 1,000,000 and prevalence of BNT162b2 vaccination among persons aged 16–24, 25–44, 45–64, and $\geq 65$ years Dec 1, 2020 – Apr 3, 2021, Israel.                                                                                                                                                          | 8               |
| Supplemental Figure 3. Seven-day daily moving average of incidence rates of COVID-19 deaths per 1,000,000 and prevalence of BNT162b2 vaccination among persons aged 45–64 and $\geq 65$ years Dec 1, 2020 – Apr 3, 2021, Israel.                                                                                                                                                                                                       | 10              |

**Supplement Table 1. Numbers and incidence rate (IR) per 100 000 person-days of laboratory-confirmed SARS-CoV-2 outcomes among unvaccinated and vaccinated with BNT162b2  $\geq 7$  days after the second dose, and unadjusted and adjusted estimates of vaccine effectiveness (VE) against laboratory-confirmed SARS-CoV-2 outcomes, by age-group,\* Jan 24, 2021–Apr 3, 2021, Israel.**

| SARS-CoV-2 outcomes by age-groups (in years)         | Unvaccinated |      | 2 doses of BNT162b2** |       | Unadjusted VE (95% CI) | Adjusted for the following variables VE (95% CI) |                  |                  |                   |
|------------------------------------------------------|--------------|------|-----------------------|-------|------------------------|--------------------------------------------------|------------------|------------------|-------------------|
|                                                      | Cases        | IR   | Cases                 | IR    |                        | Age                                              | Sex              | Week             | Fully-adjusted*** |
| <b>SARS-CoV-2 infections<sup>‡</sup></b>             |              |      |                       |       |                        |                                                  |                  |                  |                   |
| 16–44                                                | 84 611       | 95.1 | 1801                  | 2.3   | 95.4 (94.0–96.5)       | 95.5 (94.2–96.6)                                 | 95.4 (94.0–96.5) | 96.0 (95.5–96.4) | 96.1 (95.7–96.5)  |
| 45–64                                                | 18 579       | 86.1 | 2264                  | 3.4   | 93.6 (91.4–95.3)       | 93.6 (91.4–95.2)                                 | 93.6 (91.4–95.2) | 94.9 (94.2–95.5) | 94.9 (94.2–95.5)  |
| $\geq 65$                                            | 5686         | 67.7 | 2201                  | 3.8   | 93.4 (91.3–95.0)       | 93.5 (91.6–95.0)                                 | 93.2 (91.1–94.9) | 95.0 (94.0–95.9) | 94.8 (93.9–95.5)  |
| All ages                                             | 109 876      | 91.5 | 6266                  | 3.1   | 94.2 (93.2–95.1)       | 94.3 (93.4–95.2)                                 | 94.2 (93.2–95.1) | 95.3 (94.8–95.7) | 95.3 (94.9–95.7)  |
| <b>Asymptomatic SARS-CoV-2 infections</b>            |              |      |                       |       |                        |                                                  |                  |                  |                   |
| 16–44                                                | 40 088       | 45.1 | 1174                  | 1.5   | 92.8 (90.3–94.7)       | 92.9 (90.3–94.8)                                 | 92.8 (90.3–94.7) | 93.6 (92.7–94.3) | 93.6 (92.8–94.4)  |
| 45–64                                                | 7414         | 32.6 | 1343                  | 2.0   | 89.1 (84.7–92.3)       | 89.1 (84.6–92.2)                                 | 89.1 (84.7–92.3) | 90.9 (89.7–92.0) | 90.8 (89.6–91.9)  |
| $\geq 65$                                            | 1636         | 19.5 | 1115                  | 1.9   | 85.9 (80.2–89.9)       | 86.6 (81.5–90.2)                                 | 85.8 (80.1–89.9) | 88.4 (85.9–90.4) | 88.5 (86.4–90.3)  |
| All ages                                             | 49 138       | 40.9 | 3632                  | 1.8   | 90.1 (88.0–91.8)       | 89.9 (87.8–91.6)                                 | 90.1 (88.0–91.8) | 91.9 (91.0–92.6) | 91.5 (90.7–92.2)  |
| <b>Symptomatic COVID-19 cases</b>                    |              |      |                       |       |                        |                                                  |                  |                  |                   |
| 16–44                                                | 28 196       | 31.7 | 352                   | 0.5   | 97.8 (97.0–98.3)       | 97.9 (97.2–98.5)                                 | 97.8 (97.0–98.3) | 97.6 (97.2–98.0) | 97.6 (97.3–97.8)  |
| 45–64                                                | 7790         | 34.3 | 560                   | 0.8   | 96.3 (95.0–97.3)       | 96.3 (95.0–97.3)                                 | 96.3 (94.9–97.2) | 96.7 (96.2–97.1) | 96.7 (96.3–97.0)  |
| $\geq 65$                                            | 3079         | 36.6 | 780                   | 1.4   | 96.1 (94.8–97.1)       | 96.1 (95.0–96.9)                                 | 96.0 (94.7–97.0) | 96.9 (96.1–97.6) | 96.4 (95.9–97.0)  |
| All ages                                             | 39 065       | 32.5 | 1692                  | 0.8   | 96.6 (95.8–97.2)       | 96.9 (96.3–97.3)                                 | 96.6 (95.8–97.2) | 97.0 (96.5–97.3) | 97.0 (96.7–97.2)  |
| <b>COVID-19 hospitalizations</b>                     |              |      |                       |       |                        |                                                  |                  |                  |                   |
| 16–44                                                | 2043         | 2.3  | 33                    | <0.01 | 98.1 (97.1–98.8)       | 98.3 (97.4–98.9)                                 | 98.1 (97.1–98.7) | 98.0 (96.9–98.7) | 98.1 (97.3–98.7)  |
| 45–64                                                | 1687         | 7.4  | 112                   | 0.2   | 97.6 (96.9–98.2)       | 97.7 (97.0–98.2)                                 | 97.7 (96.9–98.2) | 97.5 (96.9–98.0) | 97.6 (97.1–98.1)  |
| $\geq 65$                                            | 1826         | 21.7 | 451                   | 0.8   | 96.6 (95.3–97.6)       | 96.6 (95.7–97.4)                                 | 96.5 (95.1–97.5) | 97.3 (96.4–98.1) | 96.8 (96.2–97.3)  |
| All ages                                             | 5526         | 4.6  | 596                   | 0.3   | 96.7 (95.5–97.6)       | 97.3 (96.8–97.7)                                 | 96.7 (95.4–97.6) | 97.4 (96.5–98.1) | 97.2 (96.8–97.5)  |
| <b>Severe and critical COVID-19 hospitalizations</b> |              |      |                       |       |                        |                                                  |                  |                  |                   |
| 16–44                                                | 644          | 0.7  | 7                     | 0.01  | 98.8 (97.3–99.5)       | 99.0 (97.8–99.5)                                 | 98.8 (97.3–99.5) | 98.6 (96.9–99.4) | 98.9 (97.6–99.5)  |
| 45–64                                                | 1132         | 5.0  | 62                    | 0.1   | 98.1 (97.2–98.6)       | 98.1 (97.4–98.7)                                 | 98.1 (97.3–98.7) | 97.9 (97.2–98.5) | 98.1 (97.5–98.5)  |
| $\geq 65$                                            | 1425         | 17.0 | 295                   | 0.5   | 97.2 (95.9–98.1)       | 97.2 (96.3–97.9)                                 | 97.1 (95.7–98.0) | 97.8 (96.9–98.5) | 97.3 (96.8–97.8)  |
| All ages                                             | 3201         | 2.7  | 364                   | 0.2   | 97.2 (95.9–98.1)       | 97.7 (97.2–98.1)                                 | 97.1 (95.8–98.0) | 98.0 (97.0–98.6) | 97.5 (97.1–97.8)  |
| <b>COVID-19 deaths</b>                               |              |      |                       |       |                        |                                                  |                  |                  |                   |
| 16–44                                                | 36           | 0    | 0                     | 0     | 100                    | 100                                              | 100              | 100              | 100               |
| 45–64                                                | 125          | 0.5  | 14                    | <0.01 | 96.2 (92.6–98.0)       | 96.5 (93.7–98.1)                                 | 96.3 (92.9–98.1) | 95.5 (91.4–97.6) | 95.8 (92.6–97.6)  |
| $\geq 65$                                            | 554          | 6.6  | 124                   | 0.2   | 96.8 (94.6–98.1)       | 96.9 (95.6–97.9)                                 | 96.7 (94.4–98.0) | 97.8 (96.4–98.7) | 96.9 (96.0–97.6)  |
| All ages                                             | 715          | 0.6  | 138                   | 0.1   | 96.6 (93.9–98.1)       | 96.9 (95.9–97.7)                                 | 96.5 (93.7–98.0) | 98.0 (96.3–98.9) | 96.7 (96.0–97.3)  |

\*Eight age groups were used for age adjustment (i.e., 16-24 years, six 10-year increments from 25-84 years, and  $\geq 85$  years) \*\* $\geq 7$  days after the second dose of BNT162b2. \*\*\*The fully-adjusted model includes age-group, sex, and week. <sup>‡</sup>Includes persons with asymptomatic and symptomatic infections as well as persons with a positive SARS-CoV-2 test that did not complete the symptom interview portion of the epidemiological investigation.

**Supplement Table 2. Numbers and incidence rate (IR) per 100 000 person-days of laboratory-confirmed SARS-CoV-2 outcomes among unvaccinated and vaccinated with BNT162b2  $\geq 14$  days after the second dose, and unadjusted and adjusted estimates of vaccine effectiveness (VE) against laboratory-confirmed SARS-CoV-2 outcomes, by age-group,\* Jan 24, 2021–Apr 3, 2021, Israel.**

| SARS-CoV-2 outcomes by age-groups (in years)         | Unvaccinated |      | 2 doses of BNT162b2** |       | Unadjusted VE (95% CI) | Adjusted for the following variables VE (95% CI) |                  |                  |                   |
|------------------------------------------------------|--------------|------|-----------------------|-------|------------------------|--------------------------------------------------|------------------|------------------|-------------------|
|                                                      | Cases        | IR   | Cases                 | IR    |                        | Age                                              | Sex              | Week             | Fully-adjusted*** |
| <b>SARS-CoV-2 infections‡</b>                        |              |      |                       |       |                        |                                                  |                  |                  |                   |
| 16–44                                                | 84 611       | 95.1 | 1066                  | 1.7   | 97.2 (96.3–97.8)       | 97.3 (96.5–98.0)                                 | 97.2 (96.3–97.8) | 97.0 (96.6–97.3) | 97.1 (96.7–97.3)  |
| 45–64                                                | 19 579       | 86.1 | 1292                  | 2.2   | 96.5 (95.6–97.2)       | 96.5 (95.6–97.2)                                 | 96.5 (95.6–97.2) | 96.5 (96.2–96.8) | 96.5 (96.3–96.7)  |
| >65                                                  | 5 686        | 67.7 | 1284                  | 2.5   | 96.1 (95.1–96.9)       | 96.1 (95.2–96.8)                                 | 96.0 (95.0–96.8) | 96.2 (95.5–96.8) | 95.9 (95.5–96.3)  |
| All ages                                             | 109 876      | 91.5 | 3642                  | 2.1   | 96.6 (96.1–97.0)       | 96.7 (96.2–97.1)                                 | 96.6 (96.1–97.0) | 96.5 (96.3–96.8) | 96.5 (96.3–96.8)  |
| <b>Asymptomatic SARS-CoV-2 infections</b>            |              |      |                       |       |                        |                                                  |                  |                  |                   |
| 15–44                                                | 40 088       | 45.1 | 666                   | 1.1   | 95.8 (94.4–96.9)       | 95.9 (94.5–97.0)                                 | 95.8 (94.4–96.9) | 95.2 (94.6–95.8) | 95.2 (94.6–95.8)  |
| 45–64                                                | 7 414        | 32.6 | 729                   | 1.3   | 94.3 (92.4–95.7)       | 94.3 (92.4–95.7)                                 | 94.3 (92.4–95.7) | 93.9 (93.3–94.5) | 94.0 (93.4–94.4)  |
| >65                                                  | 1 636        | 19.5 | 633                   | 1.2   | 91.7 (88.8–93.8)       | 91.9 (89.3–93.9)                                 | 91.6 (88.7–93.8) | 91.4 (89.9–92.7) | 91.5 (90.4–92.5)  |
| All ages                                             | 49 138       | 40.9 | 2028                  | 1.2   | 94.4 (93.3–95.3)       | 94.2 (93.1–95.1)                                 | 94.4 (93.3–95.3) | 94.1 (93.5–94.7) | 93.8 (93.3–94.2)  |
| <b>Symptomatic COVID-19 cases</b>                    |              |      |                       |       |                        |                                                  |                  |                  |                   |
| 16–44                                                | 28196        | 31.7 | 230                   | 0.4   | 98.4 (97.7–98.8)       | 98.5 (97.9–98.9)                                 | 98.3 (97.7–98.8) | 98.0 (97.6–98.3) | 97.8 (97.5–98.1)  |
| 45–64                                                | 7790         | 34.3 | 333                   | 0.6   | 97.9 (97.2–98.4)       | 97.9 (97.2–98.4)                                 | 97.9 (97.2–98.4) | 97.7 (97.4–98.0) | 97.7 (97.4–97.9)  |
| >65                                                  | 3079         | 36.6 | 437                   | 0.9   | 97.9 (97.3–98.4)       | 97.8 (97.3–98.2)                                 | 97.9 (97.3–98.3) | 97.9 (97.3–98.3) | 97.5 (97.2–97.8)  |
| All ages                                             | 39 065       | 32.5 | 1000                  | 0.6   | 98.0 (97.6–98.3)       | 98.1 (97.7–98.3)                                 | 98.0 (97.6–98.3) | 97.8 (97.5–98.0) | 97.7 (97.5–97.9)  |
| <b>COVID-19 hospitalizations</b>                     |              |      |                       |       |                        |                                                  |                  |                  |                   |
| 16–44                                                | 2043         | 2.3  | 26                    | 0.0   | 98.1 (97.0–98.8)       | 98.3 (97.3–98.9)                                 | 98.1 (97.0–98.8) | 97.9 (96.8–98.7) | 98.1 (97.1–98.7)  |
| 45–64                                                | 1687         | 7.4  | 74                    | 0.1   | 98.3 (97.6–98.7)       | 98.3 (97.7–98.7)                                 | 98.3 (97.7–98.7) | 98.1 (97.6–98.6) | 98.2 (97.7–98.6)  |
| >65                                                  | 1826         | 21.7 | 259                   | 0.5   | 98.2 (97.6–98.7)       | 98.0 (97.5–98.4)                                 | 98.2 (97.6–98.7) | 98.3 (97.6–98.7) | 97.9 (97.6–98.1)  |
| All ages                                             | 5556         | 4.6  | 359                   | 0.2   | 98.2 (97.5–98.7)       | 98.1 (97.8–98.4)                                 | 98.2 (97.5–98.6) | 98.2 (97.6–98.7) | 98.0 (97.7–98.3)  |
| <b>Severe and critical COVID-19 hospitalizations</b> |              |      |                       |       |                        |                                                  |                  |                  |                   |
| 16–44                                                | 644          | 0.7  | 5                     | 0.01  | 98.9 (97.3–99.6)       | 99.1 (97.8–99.6)                                 | 98.9 (97.3–99.6) | 98.7 (96.8–99.5) | 99.0 (97.5–99.6)  |
| 45–64                                                | 1132         | 5.0  | 41                    | 0.1   | 98.6 (97.9–99.0)       | 98.6 (98.0–99.0)                                 | 98.6 (97.9–99.0) | 98.4 (97.8–98.9) | 98.5 (97.9–98.9)  |
| >65                                                  | 1425         | 17.0 | 160                   | 0.3   | 98.7 (98.1–99.1)       | 98.5 (98.0–98.8)                                 | 98.7 (98.2–99.1) | 98.7 (98.2–99.1) | 98.3 (98.0–98.6)  |
| All ages                                             | 3201         | 2.7  | 206                   | 0.1   | 98.6 (98.0–99.0)       | 98.5 (98.2–98.8)                                 | 98.6 (98.0–99.0) | 98.6 (98.0–99.1) | 98.4 (98.1–98.6)  |
| <b>COVID-19 deaths</b>                               |              |      |                       |       |                        |                                                  |                  |                  |                   |
| 16–44                                                | 36           | 0.04 | 0                     | 0     | 100                    | 100                                              | 100              | 100              | 100               |
| 45–64                                                | 125          | 0.5  | 10                    | <0.01 | 96.9 (93.5–98.5)       | 97.1 (94.4–98.6)                                 | 97.0 (93.7–98.5) | 96.3 (92.2–98.2) | 96.5 (93.2–98.2)  |
| >65                                                  | 554          | 6.6  | 61                    | 0.1   | 98.7 (97.8–99.2)       | 98.4 (97.7–98.9)                                 | 98.7 (97.9–99.2) | 98.7 (97.9–99.2) | 98.2 (97.7–98.7)  |
| All ages                                             | 715          | 0.6  | 71                    | <0.01 | 98.5 (97.4–99.2)       | 98.2 (97.6–98.7)                                 | 98.6 (97.4–99.2) | 98.7 (97.6–99.3) | 98.1 (97.6–98.5)  |

\*Eight age groups were used for age adjustment (i.e., 16-24 years, six 10-year increments from 25-84 years, and  $\geq 85$  years) \*\* $\geq 14$  days after the second dose of BNT162b2. \*\*\*The fully-adjusted model includes age-group, sex, and week. †Includes persons with asymptomatic and symptomatic infections as well as persons with a positive SARS-CoV-2 test that did not complete the symptom interview portion of the epidemiological investigation.

**Supplemental Table 3. Numbers and incidence rate (IR) per 100 000 person-days of laboratory-confirmed SARS-CoV-2 outcomes among unvaccinated and partially-vaccinated (one dose of BNT162b2 14 days to 21 days after the first dose), and unadjusted and adjusted estimates of vaccine effectiveness (VE) against laboratory-confirmed SARS-CoV-2 outcomes among individuals  $\geq 16$  years of age, Jan 24, 2021–Apr 3, 2021, Israel.**

| SARS-CoV-2 outcomes                           | Unvaccinated |      | Partially-vaccinated* |      | Unadjusted VE<br>(95% CI) | Adjusted VE**<br>(95% CI) |
|-----------------------------------------------|--------------|------|-----------------------|------|---------------------------|---------------------------|
|                                               | Cases        | IR   | Cases                 | IR   |                           |                           |
| SARS-CoV-2 infections‡                        | 109 876      | 91.5 | 9327                  | 34.1 | 56.6 (50.9–61.7)          | 57.7 (54.9–60.3)          |
| Asymptomatic SARS-CoV-2 infections            | 49 138       | 40.9 | 4429                  | 16.2 | 48.9 (40.4–56.2)          | 52.0 (48.9–55.0)          |
| Symptomatic COVID-19 cases                    | 39 065       | 32.5 | 3099                  | 11.3 | 63.2 (56.9–68.7)          | 62.5 (59.3–65.4)          |
| COVID-19 hospitalizations                     | 5556         | 4.6  | 397                   | 1.5  | 76.9 (67.6–83.5)          | 75.7 (72.0–79.0)          |
| Severe and critical COVID-19 hospitalizations | 3201         | 2.7  | 236                   | 0.9  | 80.2 (70.2–86.8)          | 75.6 (71.9–78.9)          |
| COVID-19 deaths                               | 715          | 0.6  | 55                    | 0.2  | 88.4 (77.3–94.1)          | 77.0 (69.7–82.6)          |

\*Partially-vaccinated is 14–21 days after receipt of first dose of BNT162b2 vaccine. \*\*Model is adjusted for age (i.e., 16–24 years, six 10-year increments from 25–84 years, and >85 years), sex, and calendar week. ‡Includes all persons (asymptomatic and symptomatic) with a positive SARS-CoV-2 test.

**Supplemental Figure 1. Seven-day daily moving average of incidence rates of COVID-19 hospitalizations per 1,000,000 and prevalence of BNT162b2 vaccination among persons aged 16–24, 25–44, 45–64, and ≥65 years Dec 1, 2020 – Apr 3, 2021, Israel. Note: Y-axis scales for COVID-19 hospitalizations vary by age group.**

A. ≥65 years

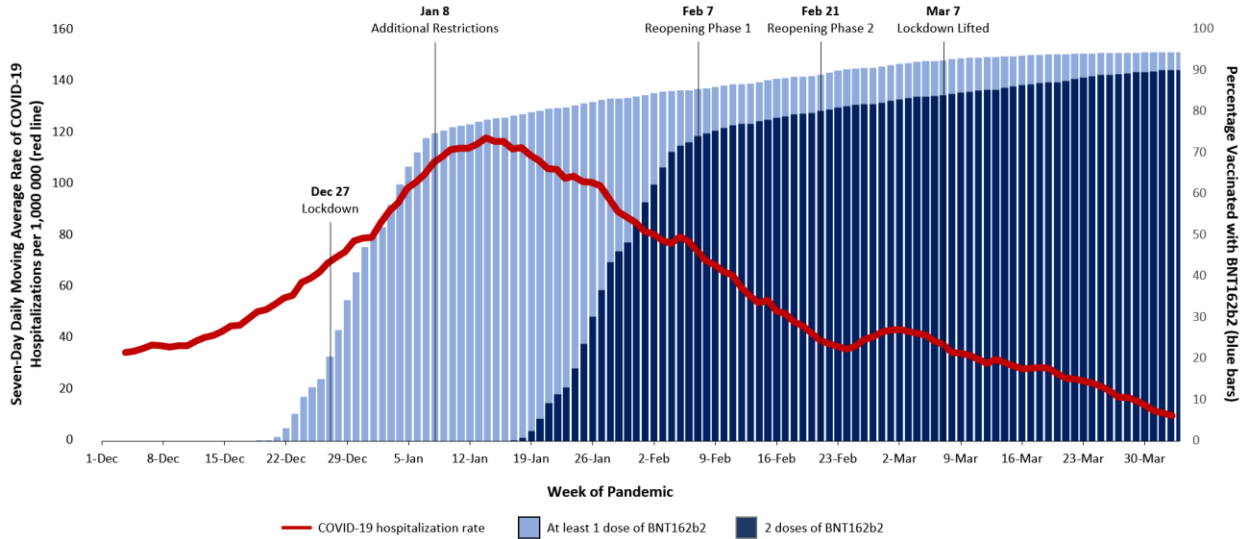

B. 45–64 years

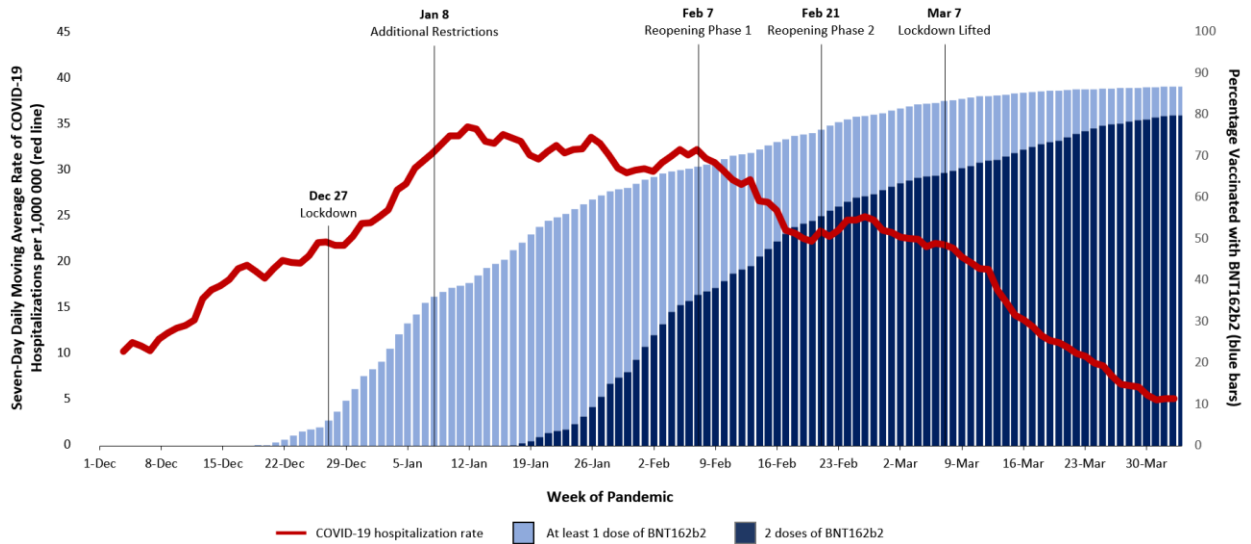

**Supplemental Figure 1 (cont). Seven-day daily moving average of incidence rates of COVID-19 hospitalizations per 1,000,000 and prevalence of BNT162b2 vaccination among persons aged 16–24, 25–44, 45–64, and  $\geq 65$  years Dec 1, 2020 – Apr 3, 2021, Israel. *Note:* Y-axis scales for COVID-19 hospitalizations vary by age group.**

C. 25–44 years

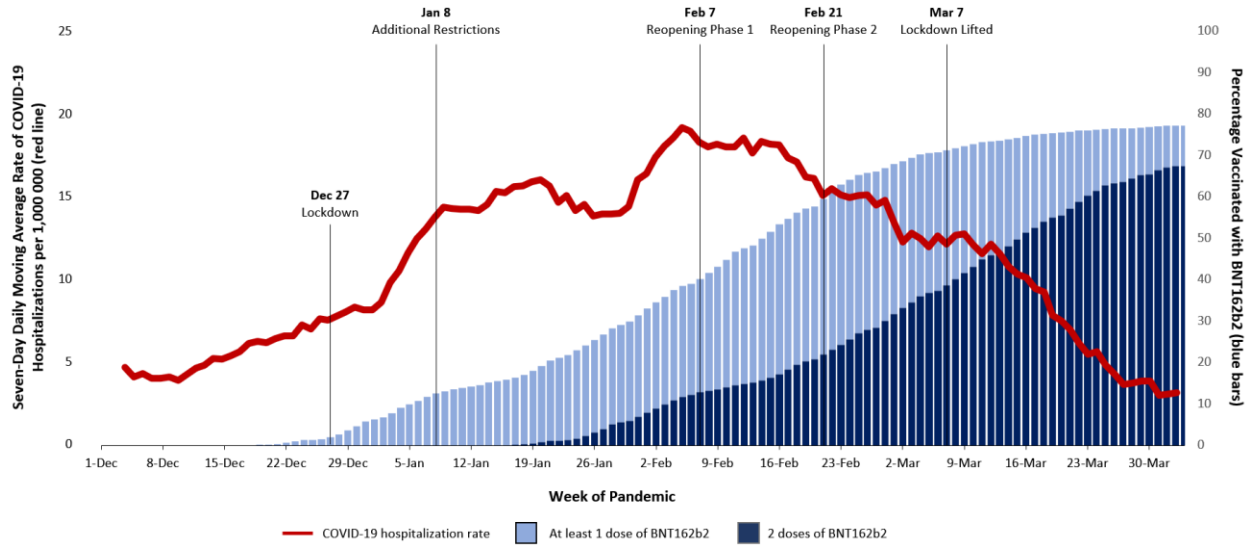

D. 16–24 years

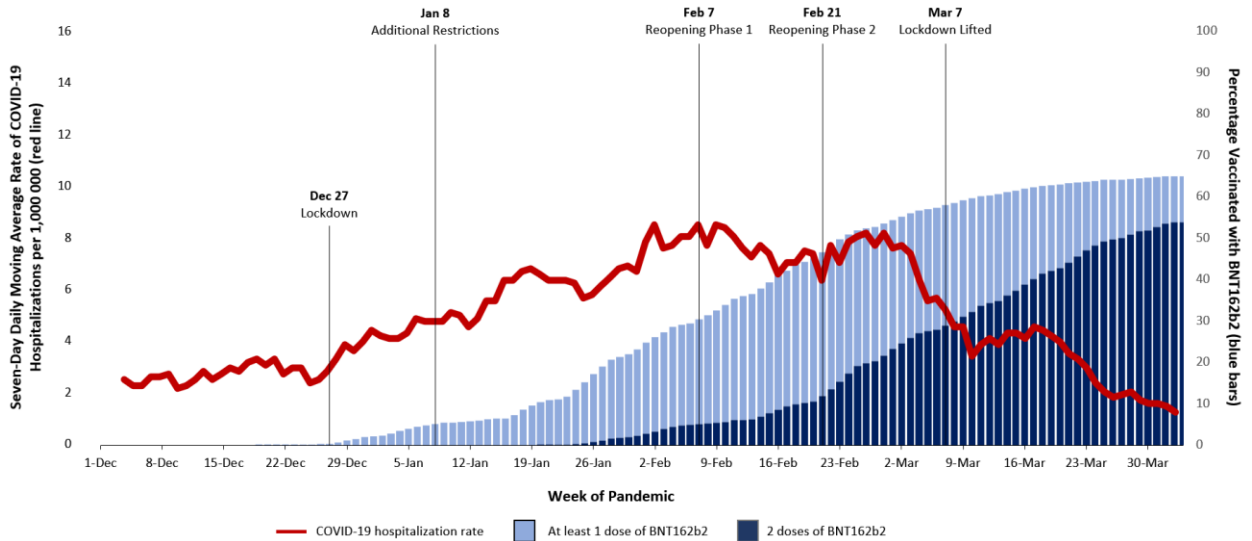

**Supplemental Figure 2. Seven-day daily moving average of incidence rates of COVID-19 severe and critical hospitalizations per 1,000,000 and prevalence of BNT162b2 vaccination among persons aged 16–24, 25–44, 45–64, and ≥65 years Dec 1, 2020 – Apr 3, 2021, Israel. Note: Y-axis scales for COVID-19 severe and critical hospitalizations vary by age group.**

A. ≥65 years

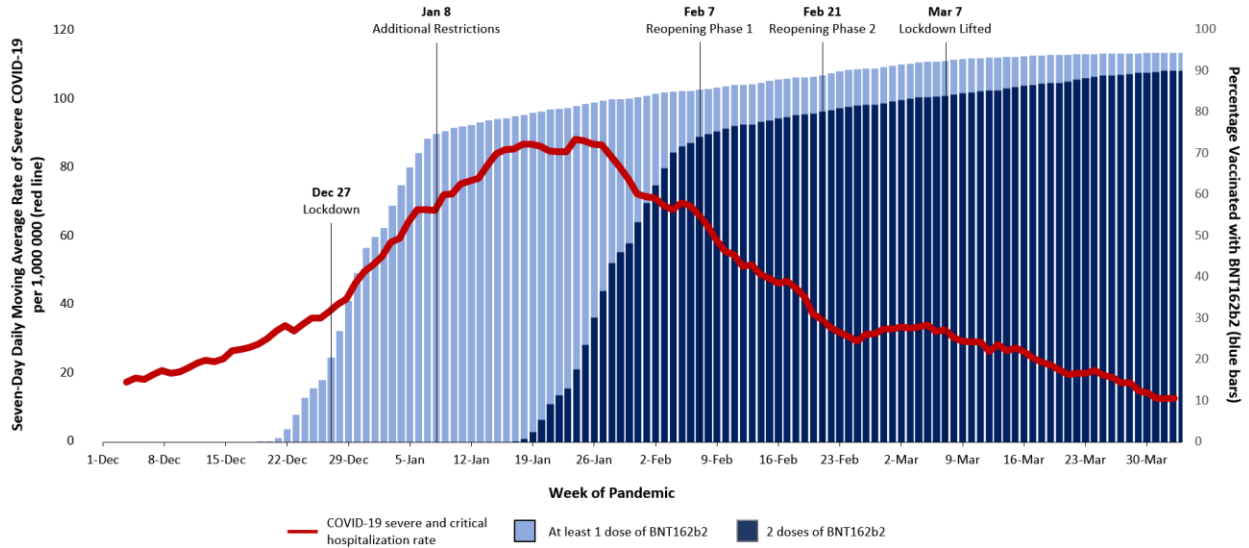

B. 45–64 years

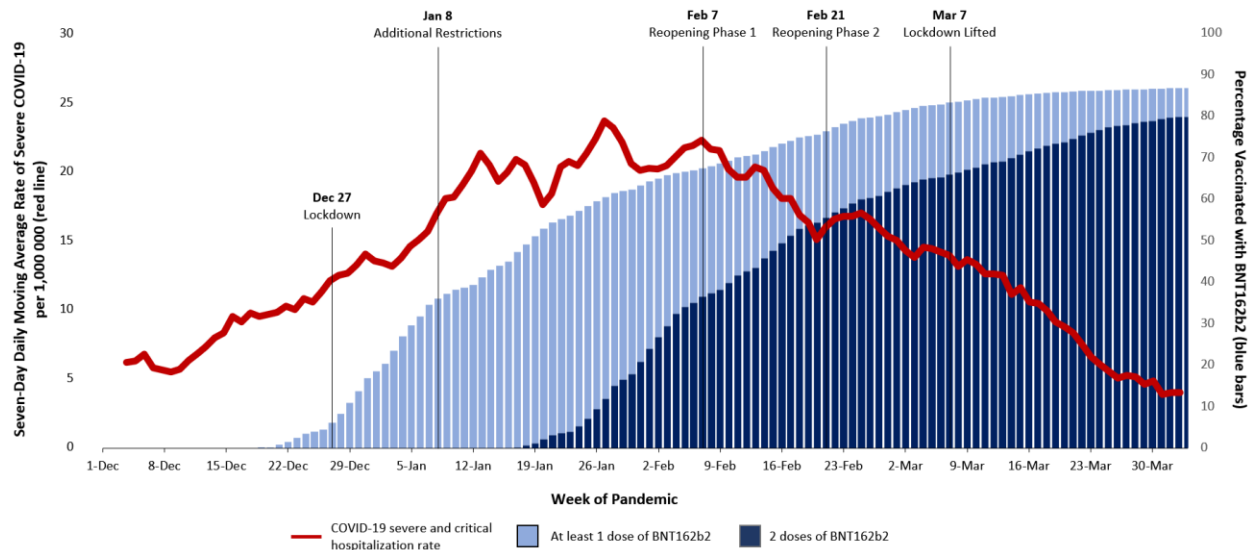



**Supplemental Figure 2 (cont). Seven-day daily moving average of incidence rates of COVID-19 severe and critical hospitalizations per 1,000,000 and prevalence of BNT162b2 vaccination among persons aged 16–24, 25–44, 45–64, and ≥65 years Dec 1, 2020–Apr 3, 2021, Israel. Note: Y-axis scales for COVID-19 severe and critical hospitalizations vary by a ge group.**

C. 25–44 years

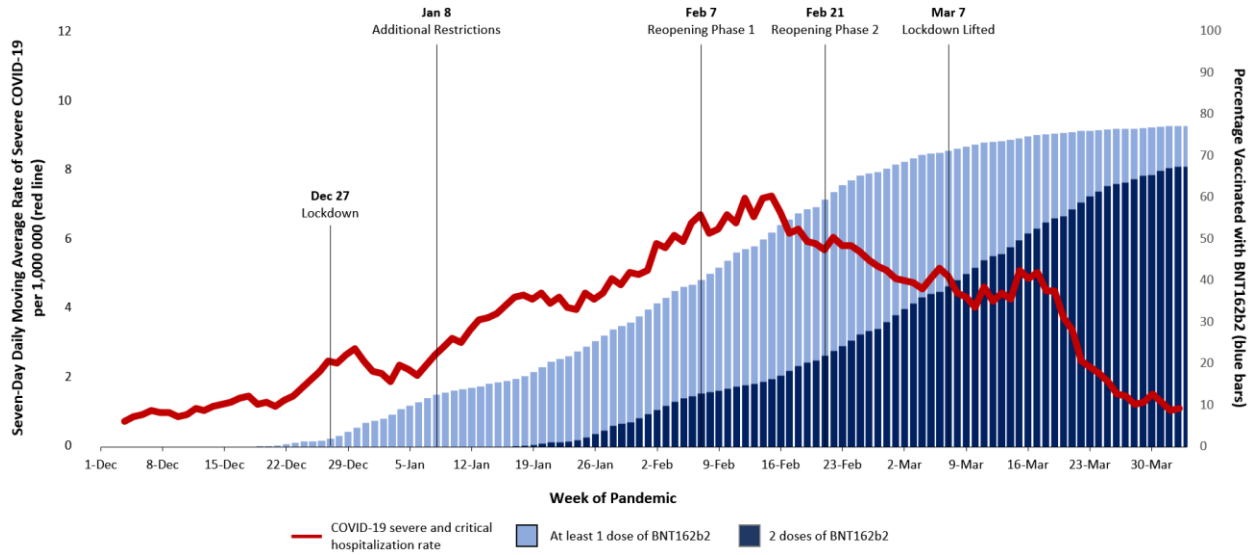

D. 16–24 years

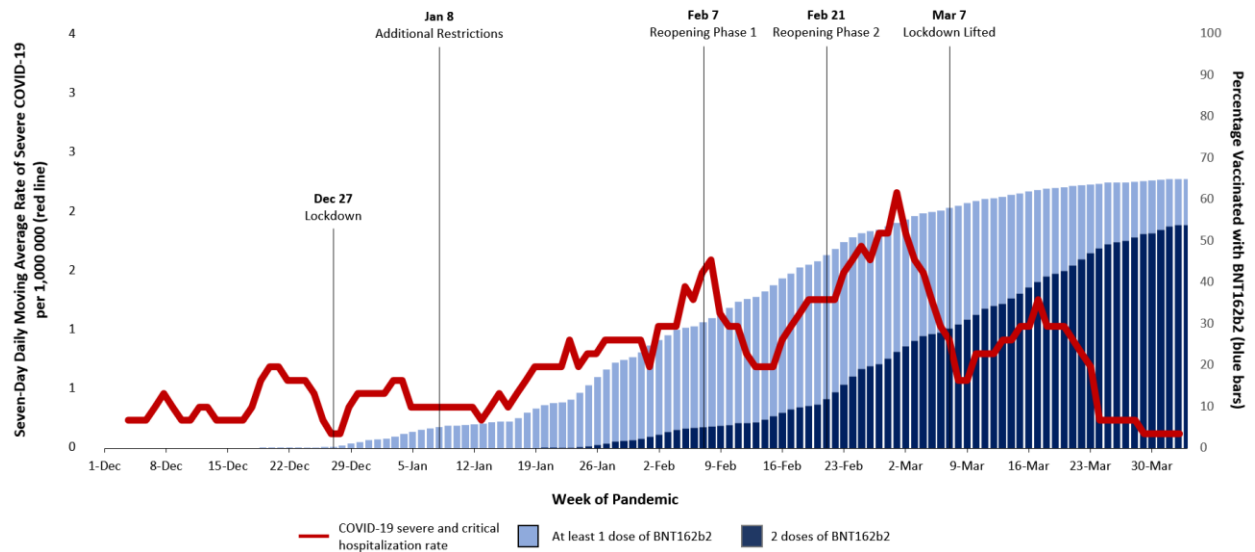

**Supplemental Figure 3. Seven-day daily moving average of incidence rates of COVID-19 deaths per 1,000,000 and prevalence of BNT162b2 vaccination among persons aged 45–64 and ≥65 years Dec 1, 2020 – Apr 3, 2021, Israel.** *Note:* Y-axis scales for COVID-19 deaths vary by a ge group. Deaths for individuals <45 years of a ge were not presented due to small sample size.

A. ≥65 years

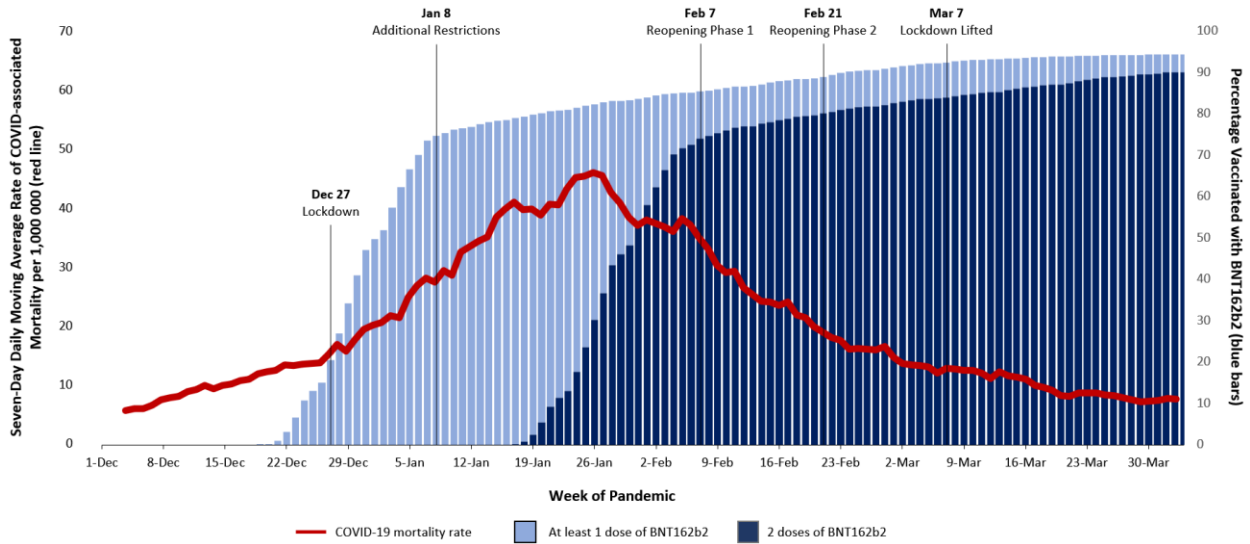

B. 45–64 years

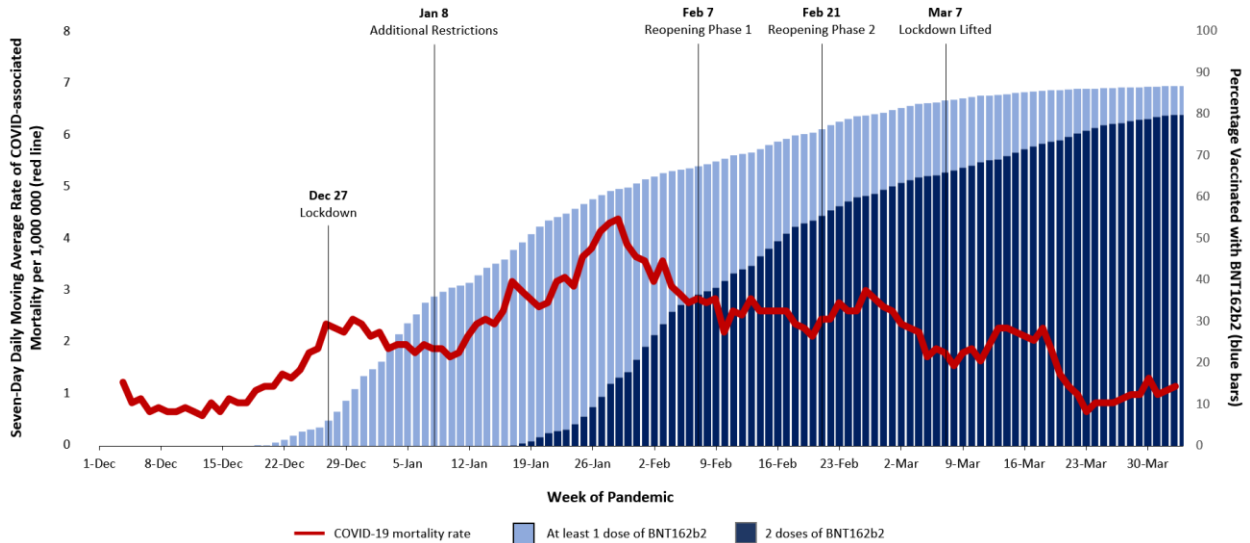

Supplement: mmc1.pdf [file mmc1.pdf]
